# Supplementary material
Source: PubMed Central journal article supplement (PMC9929696)
Supplement: jama-e230128-s002.pdf [file jama-e230128-s002.pdf]

## Supplemental Online Content

Martinez FJ, Han MK, Lopez C, et al; CAPTURE Study Group. Discriminative accuracy of the CAPTURE tool for identifying chronic obstructive pulmonary disease in US primary care settings. *JAMA*. Published February 14, 2023. doi:10.1001/jama.2023.0128

### eAbbreviations

**eFigure 1.** Geographic distribution of participating PBRNs

**eFigure 2.** The CAPTURE screening tool

**eFigure 3.** Screening results and classification of patients based on spirometry and symptom assessment

**eFigure 4.** Sensitivity and specificity of the screening tool for clinically significant COPD in pre-specified subgroups

**eFigure 5.** Positive and negative predictive value of the screening tool for clinically significant COPD in pre-specified subgroups

**eFigure 6.** ROC curves for varying thresholds of the CAPTURE questionnaire score and PEFR separately to detect clinically significant COPD

**eFigure 7.** Sensitivity and specificity of the screening tool for spirometry-defined COPD in pre-specified subgroups

**eFigure 8.** ROC curves for varying thresholds defining a positive screen to detect spirometry-defined COPD

**eFigure 9.** Sensitivity and specificity of the screening tool for clinically significant COPD in additional subgroups

**eFigure 10.** Unadjusted and covariate-adjusted associations of patient and site characteristics with screening tool sensitivity and specificity for clinically significant COPD

**eTable 1.** Characteristics of participating practices

**eTable 2.** Characteristics of excluded and included patients

**eTable 3.** Operating characteristics of the screening tool for detecting clinically significant COPD across a range of thresholds defining a positive screen

**eTable 4.** Unadjusted and covariate-adjusted associations of patient and site characteristics with screening tool sensitivity and specificity for clinically significant COPD

### eReference

This supplemental material has been provided by the authors to give readers additional information about their work.

## **eAbbreviations**

|      |                                   |
|------|-----------------------------------|
| AUC  | Area under curve                  |
| BMI  | Body mass index                   |
| CI   | Confidence interval               |
| DO   | Doctor of osteopathy              |
| GED  | General Educational Development   |
| ICS  | Inhaled corticosteroid            |
| LABA | Long-acting beta agonist          |
| LAMA | Long-acting muscarinic antagonist |
| mMRC | modified Medical Research Council |
| NP   | Nurse practitioner                |
| OR   | Odds ratio                        |
| PA   | Physician assistant               |
| PBRN | Practice-based research network   |
| PEFR | Peak expiratory flow rate         |
| ROC  | Receiver operating characteristic |
| SABD | Short-acting bronchodilator       |
| SD   | Standard deviation                |

**eFigure 1.** Geographic distribution of participating PBRNs

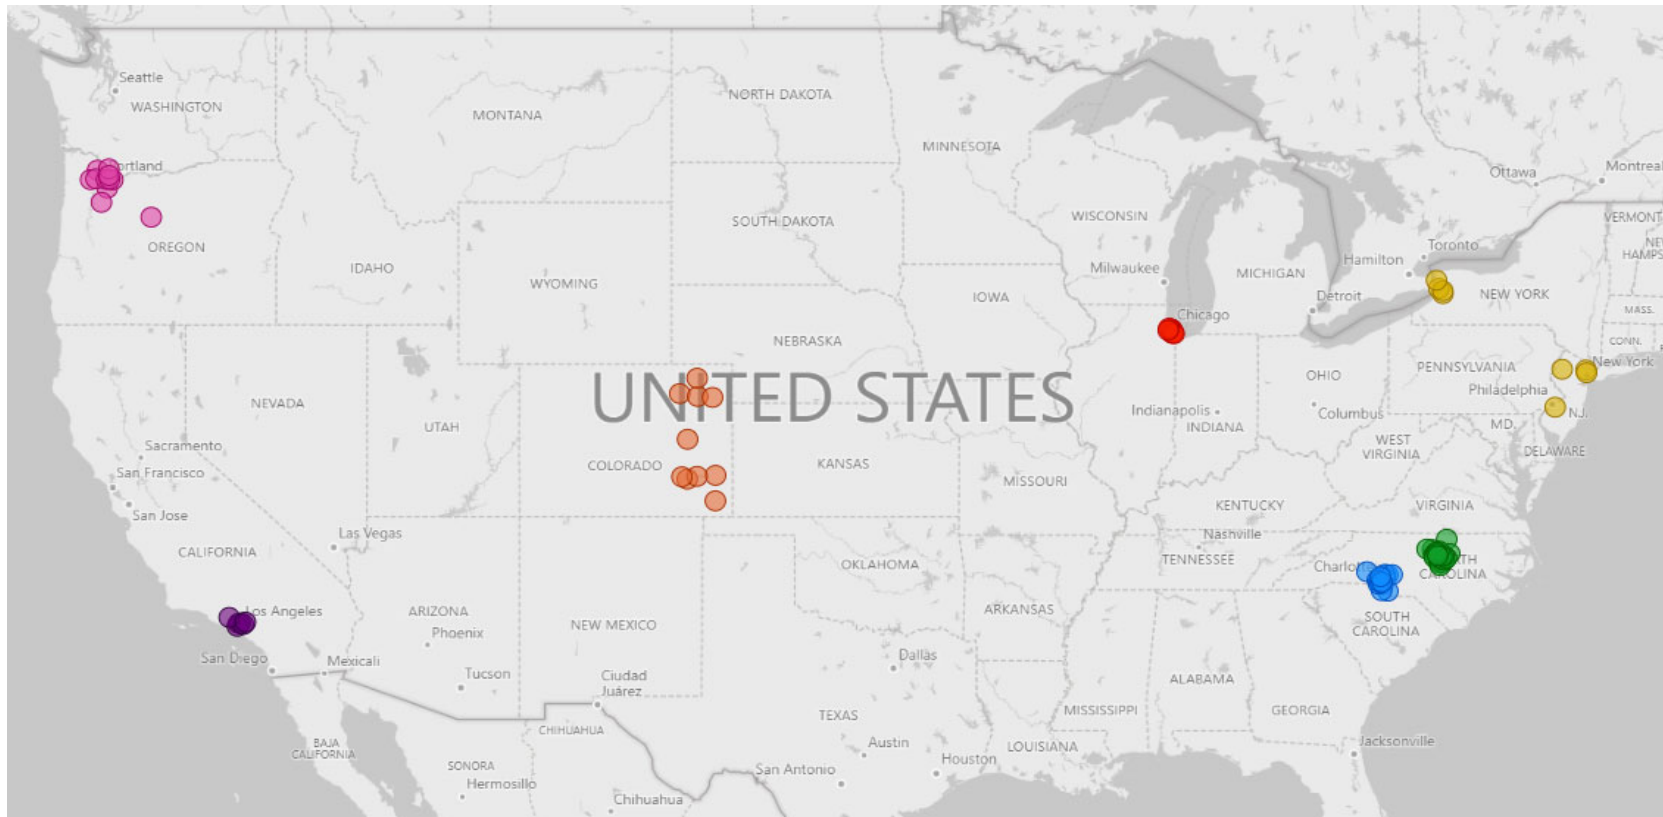

CC – Circuit Clinical Research Network (●); Duke PCRC – Primary Care Research Consortium (●); MAPPR – Mecklenburg Area Partnership for Primary Care Research – Atrium (●); ORPRN – Oregon Rural Practice-based Research Network (●); UIC PBRN – University of Illinois at Chicago Primary Care Network (●); LA Net – Los Angeles Network (●); High Plains Research Network (●).

**eFigure 2.** The CAPTURE screening tool<sup>1</sup>

For each question, place an X in the box with the answer that is best for you. There are no right or wrong answers, only answers which are right for you.

| Please answer each question                                                                                                      | No<br>(0 points)                                      | Yes<br>(1 point)                                     |                                                            |
|----------------------------------------------------------------------------------------------------------------------------------|-------------------------------------------------------|------------------------------------------------------|------------------------------------------------------------|
| 1. Have you ever lived or worked in a place with dirty or polluted air, smoke, second-hand smoke, or dust?                       | <input type="checkbox"/>                              | <input type="checkbox"/>                             |                                                            |
| 2. Does your breathing change with the seasons, weather, or air quality?                                                         | <input type="checkbox"/>                              | <input type="checkbox"/>                             |                                                            |
| 3. Does your breathing make it difficult to do such things as carry heavy loads, shovel dirt or snow, jog, play tennis, or swim? | <input type="checkbox"/>                              | <input type="checkbox"/>                             |                                                            |
| 4. Compared to others your age, do you tire easily?                                                                              | <input type="checkbox"/>                              | <input type="checkbox"/>                             |                                                            |
| 5. In the past 12 months, how many times did you miss work, school, or other activities due to a cold, bronchitis, or pneumonia? | <b>None</b><br>(0 points)<br><input type="checkbox"/> | <b>Once</b><br>(1 point)<br><input type="checkbox"/> | <b>2 or more</b><br>(2 points)<br><input type="checkbox"/> |

**Total Score (0-6):** \_\_\_\_\_

**Total Score** (check **ONLY one box** based on above score)

**RECOMMENDED ACTION:**

|                                        |                                                                                                |
|----------------------------------------|------------------------------------------------------------------------------------------------|
| <b>0 or 1</b> <input type="checkbox"/> | <b>A. Low likelihood of COPD</b> based on CAPTURE: No further testing recommended at this time |
|----------------------------------------|------------------------------------------------------------------------------------------------|

|                                                                              |                                          |                          |                                                                                                                         |
|------------------------------------------------------------------------------|------------------------------------------|--------------------------|-------------------------------------------------------------------------------------------------------------------------|
| <b>2, 3, or 4</b><br>Record Highest Peak Flow (highest of 3):<br>_____ L/min | (check one based on highest Peak Flow)   |                          | <b>B. Consider rescreening or reassessing</b> in 12 months<br><br><b>C. Evaluation including spirometry</b> recommended |
|                                                                              | Females ≥ 250 L/min<br>Males ≥ 350 L/min | <input type="checkbox"/> |                                                                                                                         |
| Females < 250 L/min<br>Males < 350 L/min                                     |                                          | <input type="checkbox"/> |                                                                                                                         |

|                                        |                                                                                       |
|----------------------------------------|---------------------------------------------------------------------------------------|
| <b>5 or 6</b> <input type="checkbox"/> | <b>D. Significant likelihood of COPD:</b> Evaluation including spirometry recommended |
|----------------------------------------|---------------------------------------------------------------------------------------|

**eFigure 3.** Screening results and classification of patients based on spirometry and symptom assessment

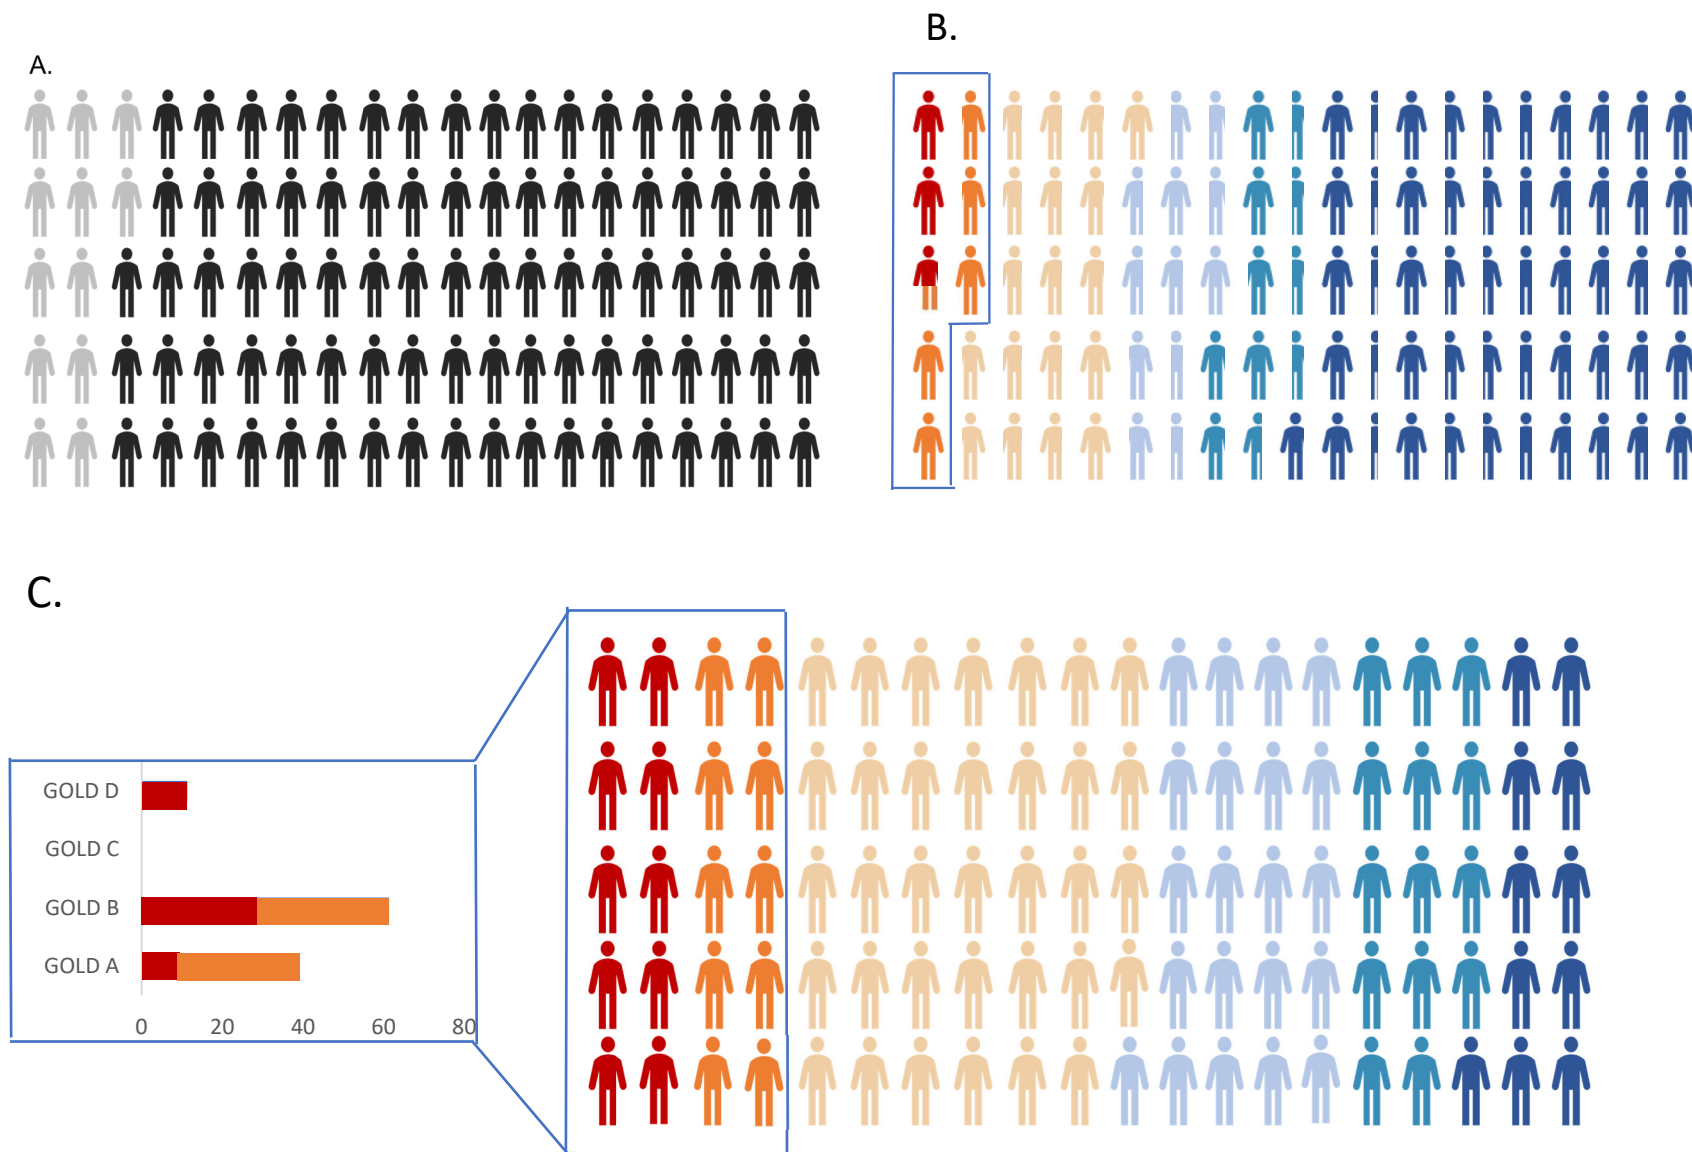

D.

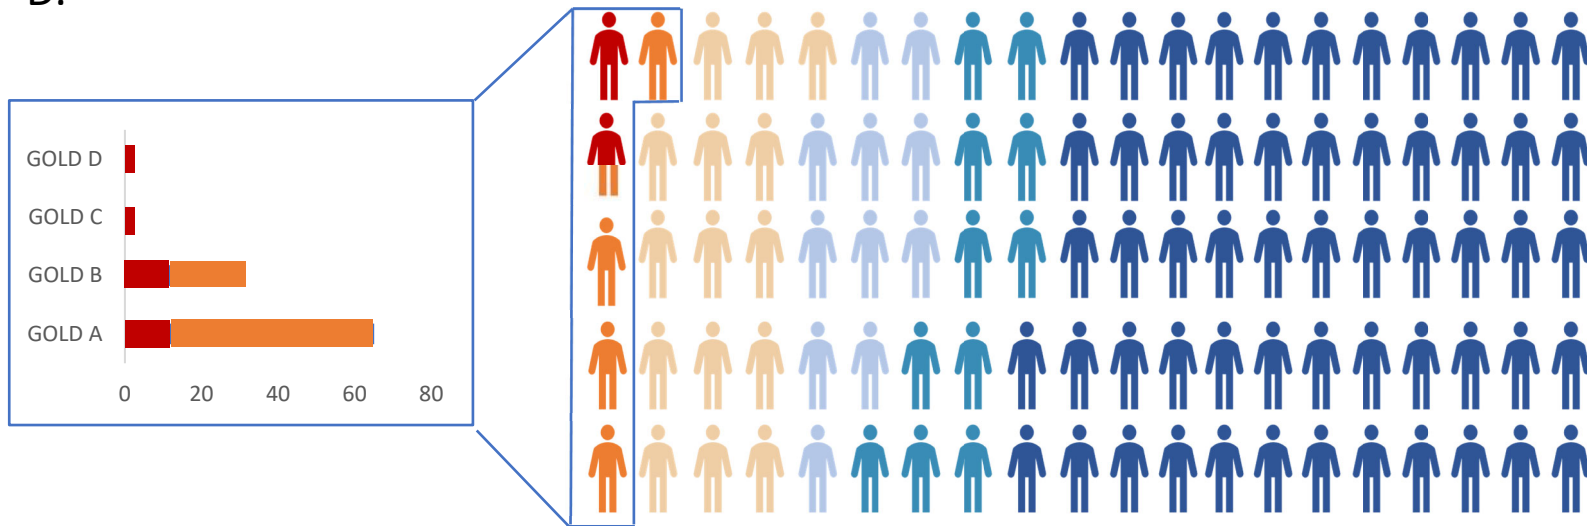

Clinically significant COPD (  ); non-clinically significant COPD (  ); preserved ratio, impaired spirometry (PRISm,  ); symptomatic, normal spirometry, former or current smoker (  ); symptomatic, normal spirometry, never smoker (  ); normal spirometry without symptoms (  ). Normal spirometry is defined as absence of COPD and PRISm. Symptomatic is defined as a CAT score  $\geq 10$ .

- Prevalence of screening tool positive (  ) and screening tool negative (  ) per 100 total patients. Screening tool positive: 12.3% of all patients; Screening tool negative: 87.7% of all patients.
- Prevalence by diagnosis and symptoms per 100 patients. For all study patients, 2.5% clinically significant COPD; 5.2% non-clinically significant COPD; 17.8% preserved ratio, impaired spirometry (PRISm); 12.0% symptomatic, normal spirometry, former or current smoker; 11.4% symptomatic, normal spirometry, never smoker; 51.1% normal spirometry without symptoms.
- Prevalence by diagnosis and symptom classification per 100 screening tool positive patients. The call out illustrates GOLD stage by the presence of clinically significant COPD (  ) or non-clinically significant COPD (  ).
- Prevalence by diagnosis and symptom classification for 100 screening tool negative patients. The call out illustrates GOLD stage by the presence of clinically significant COPD (  ) or non-clinically significant COPD (  ).

**eFigure 4.** Sensitivity and specificity of the screening tool for clinically significant COPD in pre-specified subgroups

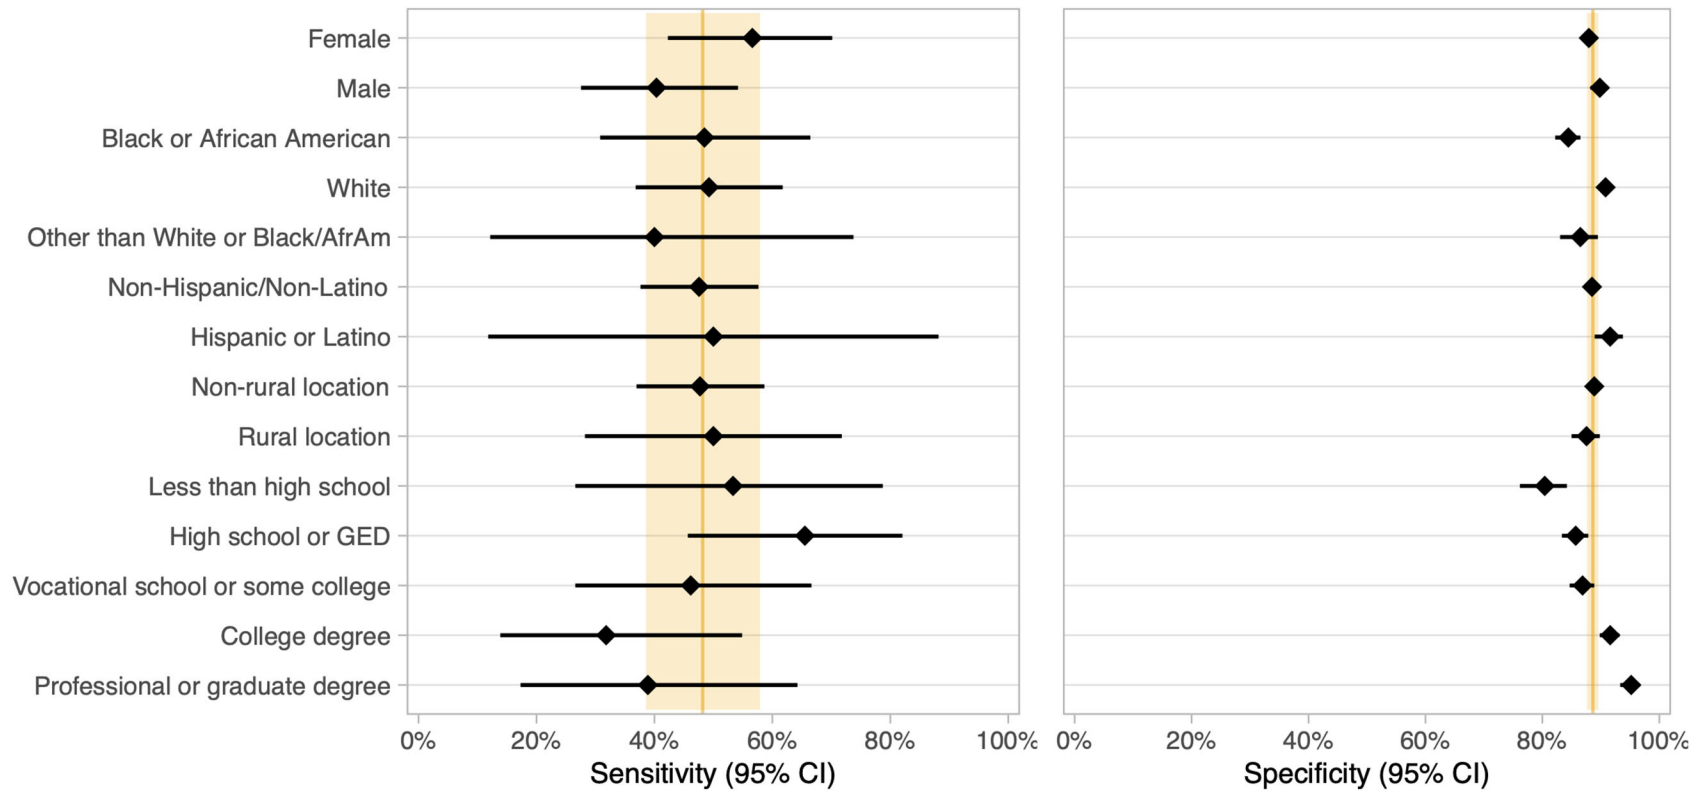

**eFigure 5.** Positive and negative predictive value of the screening tool for clinically significant COPD in pre-specified subgroups

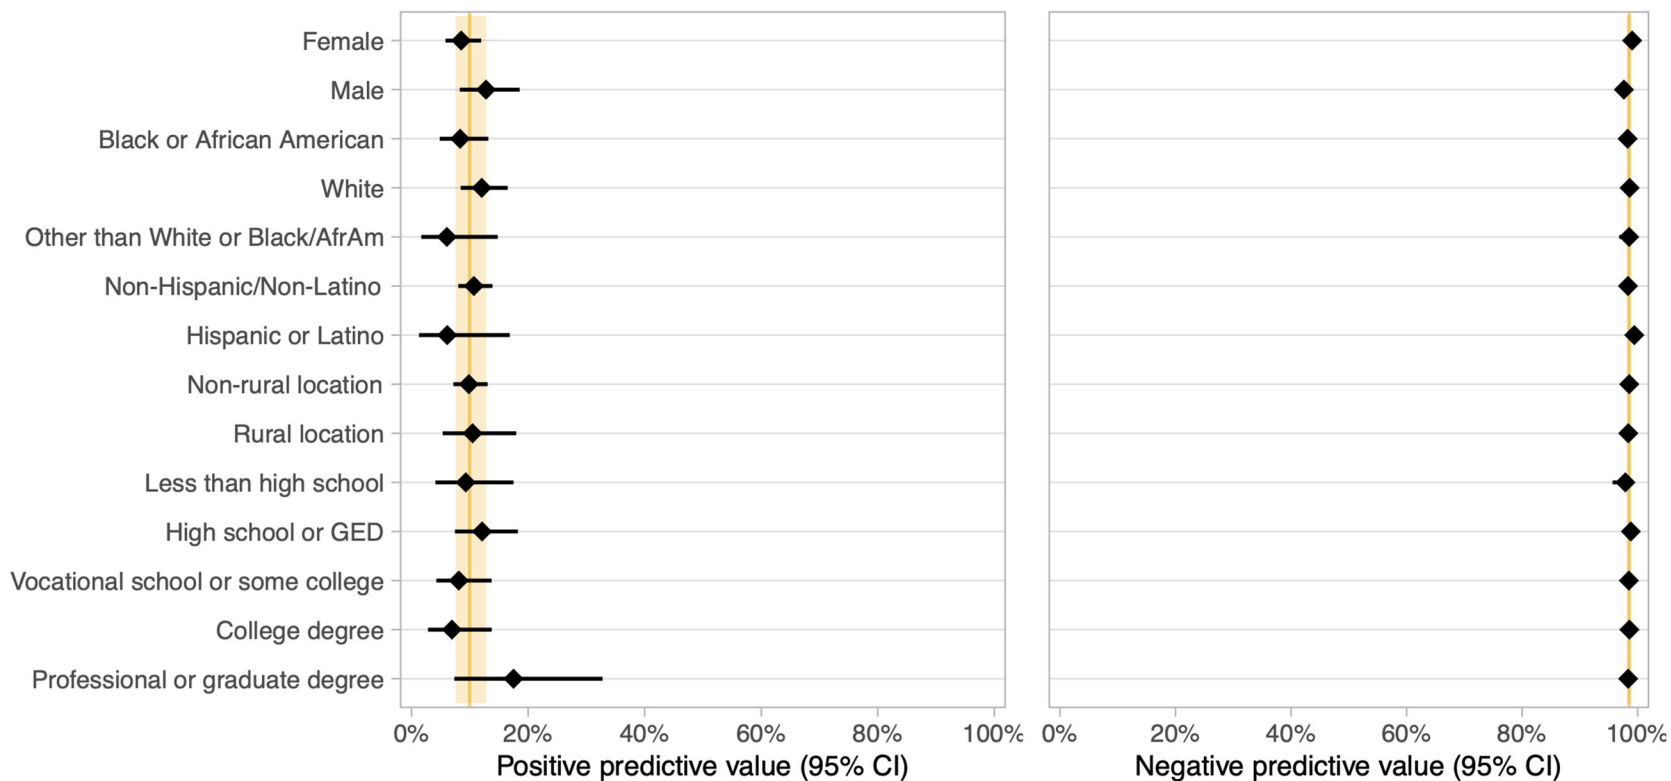



**eFigure 6.** ROC curves for varying thresholds of the CAPTURE questionnaire score and PEFR separately to detect clinically significant COPD

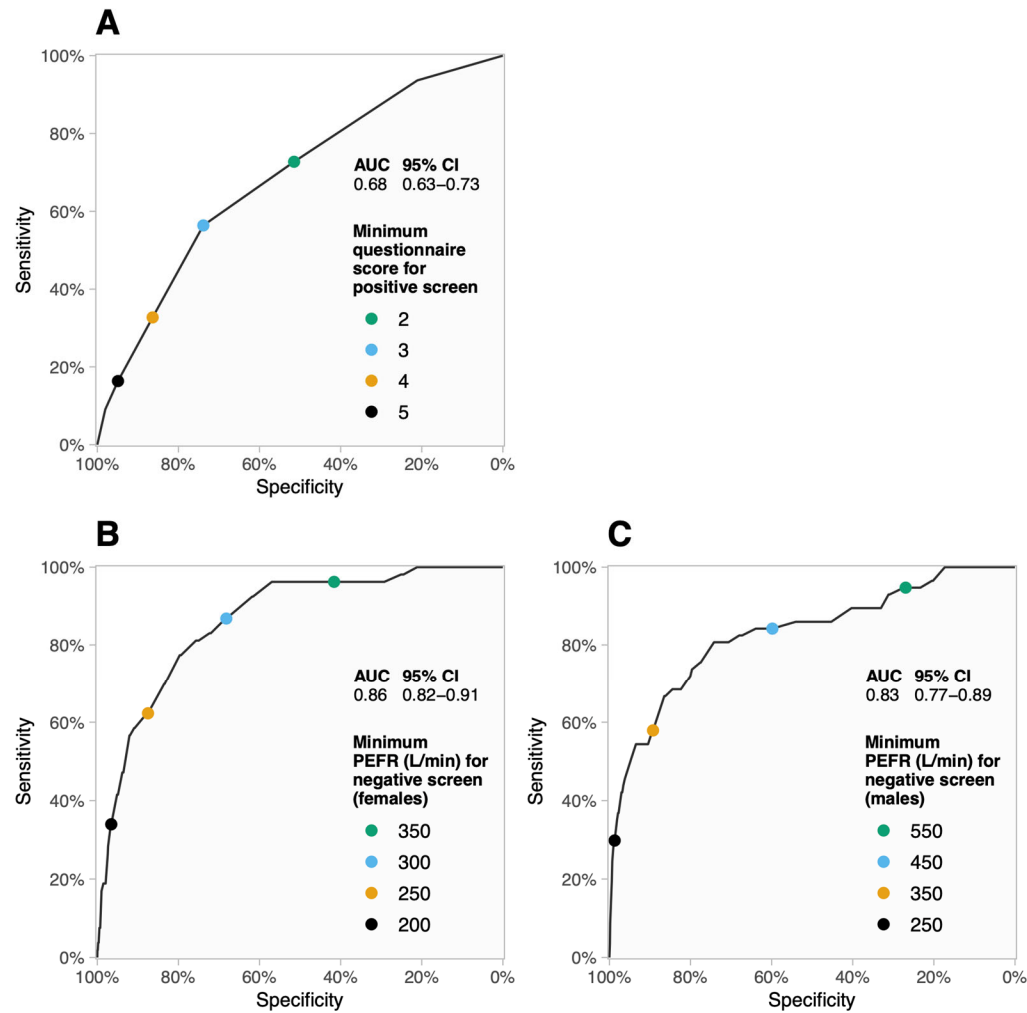

ROC curves formed by defining a positive screen based on (A) the CAPTURE questionnaire score alone, (B) PEFR alone in female patients, and (C) PEFR alone in male patients.

**eFigure 7.** Sensitivity and specificity of the screening tool for spirometry-defined COPD in pre-specified subgroups

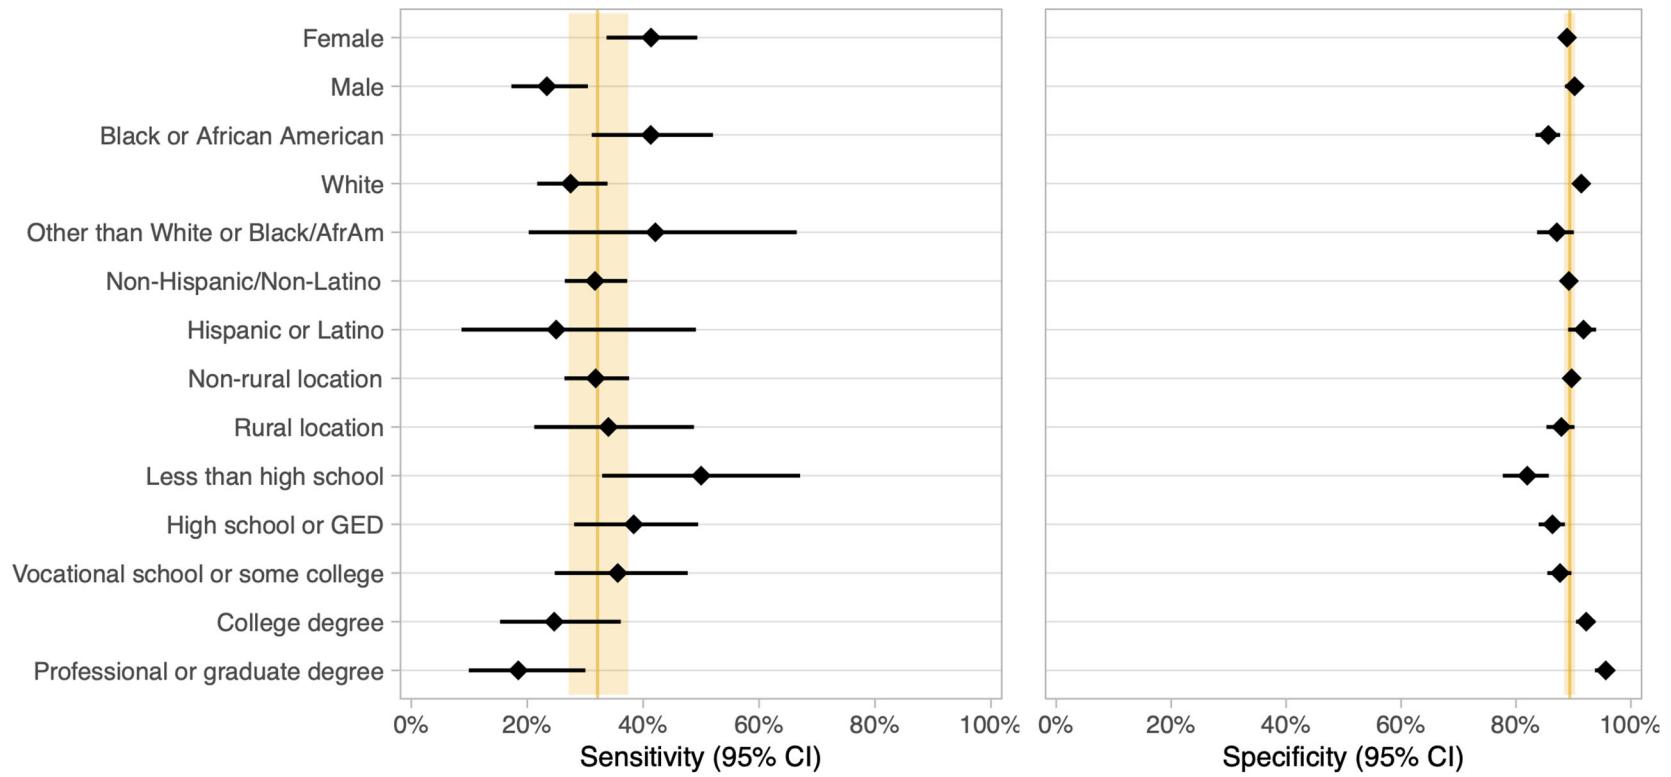

**eFigure 8.** ROC curves for varying thresholds defining a positive screen to detect spirometry-defined COPD

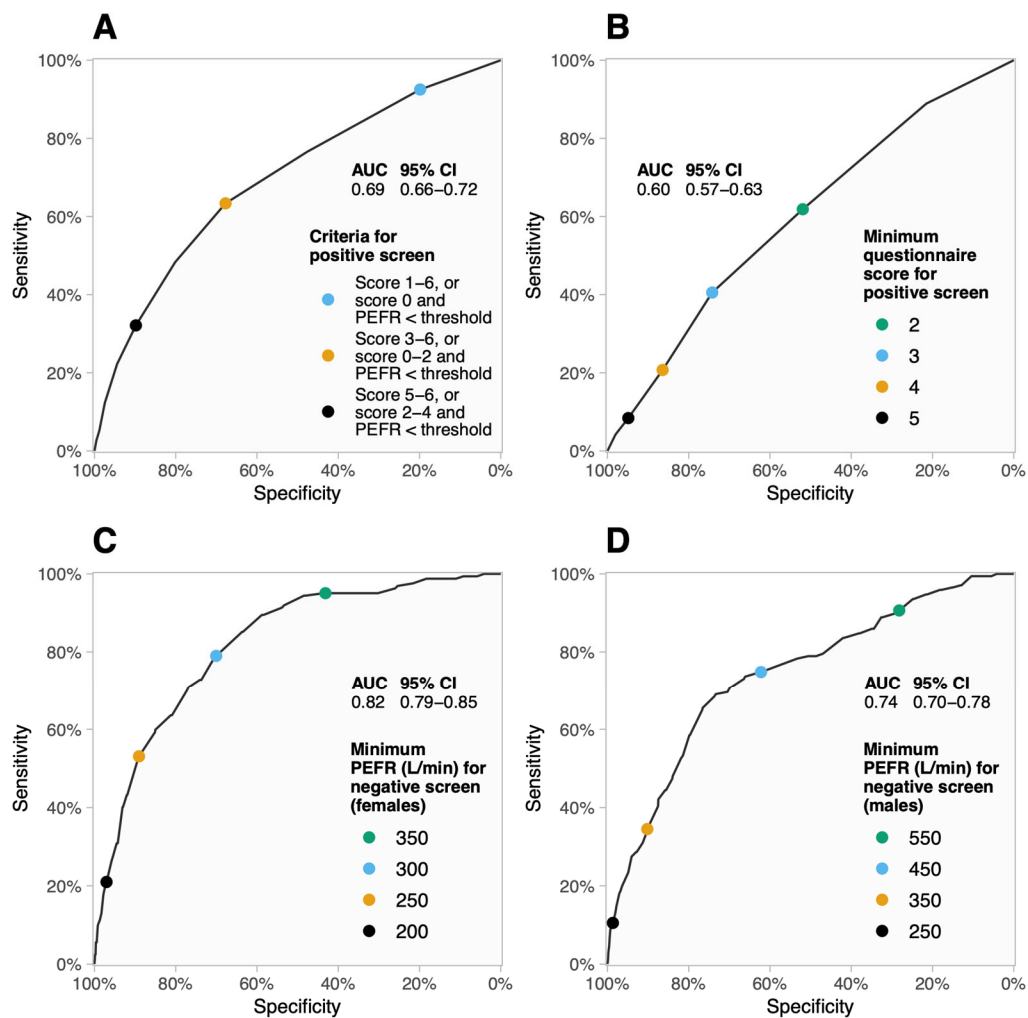

ROC curves formed by defining a positive screen based on (A) the CAPTURE questionnaire score combined with PEFR (thresholds of < 250 L/min for females and < 350 L/min for males), (B) the questionnaire score alone, (C) PEFR alone in female patients, and (D) PEFR alone in male patients.

**eFigure 9.** Sensitivity and specificity of the screening tool for clinically significant COPD in additional subgroups

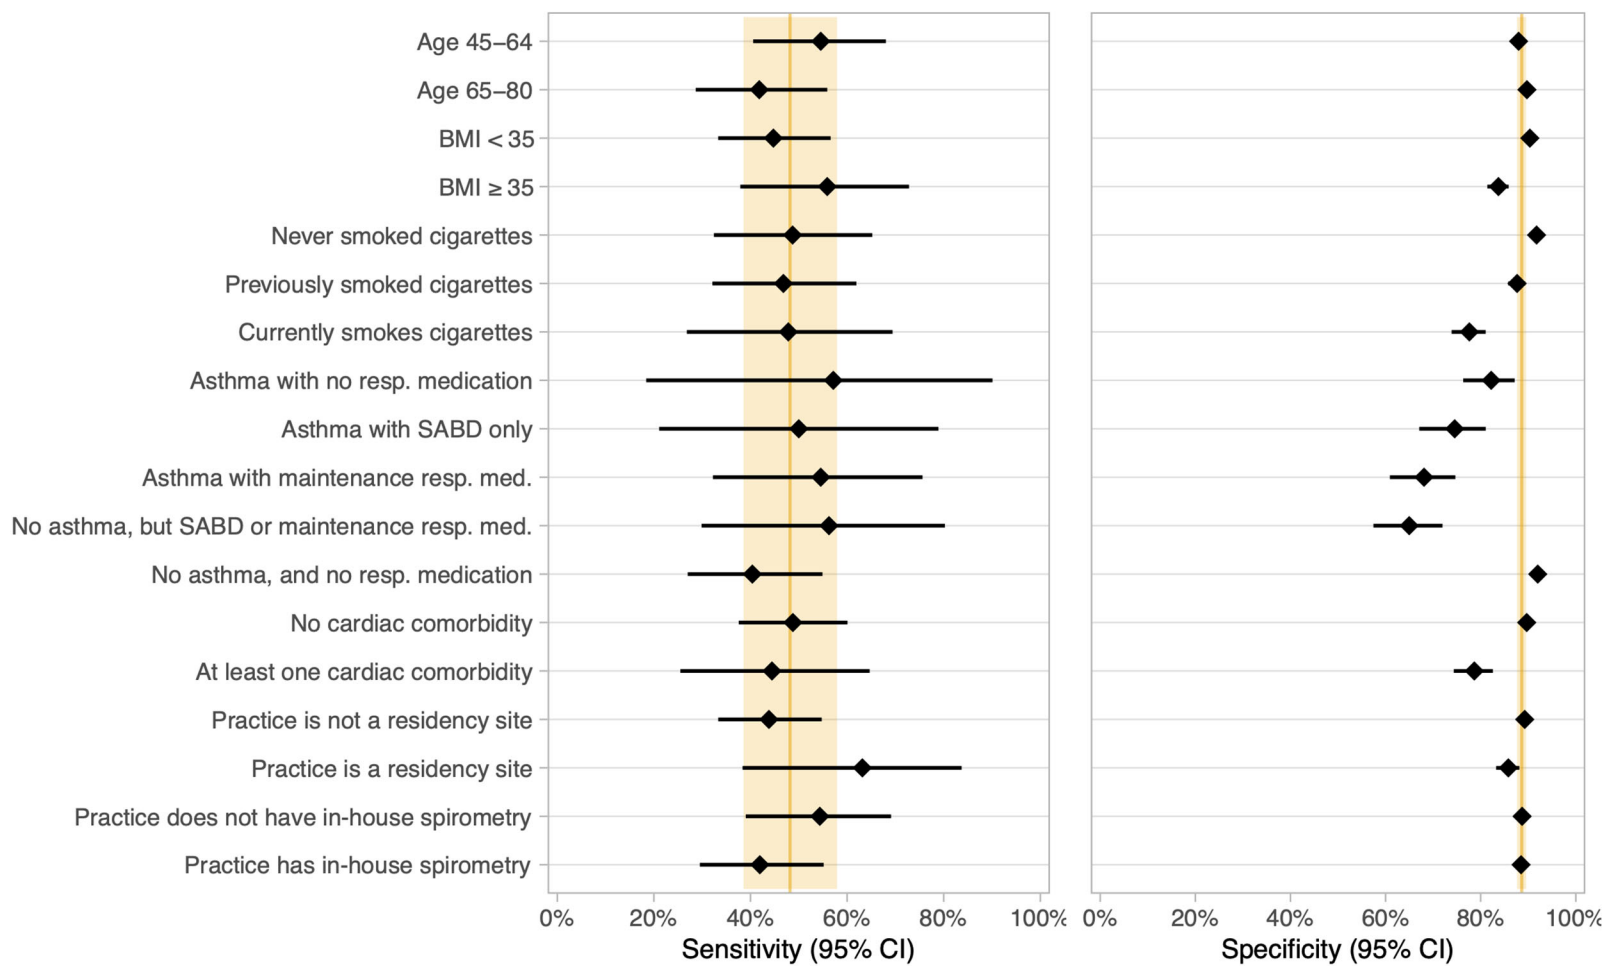

**eFigure 10.** Unadjusted and covariate-adjusted associations of patient and site characteristics with screening tool sensitivity and specificity for clinically significant COPD

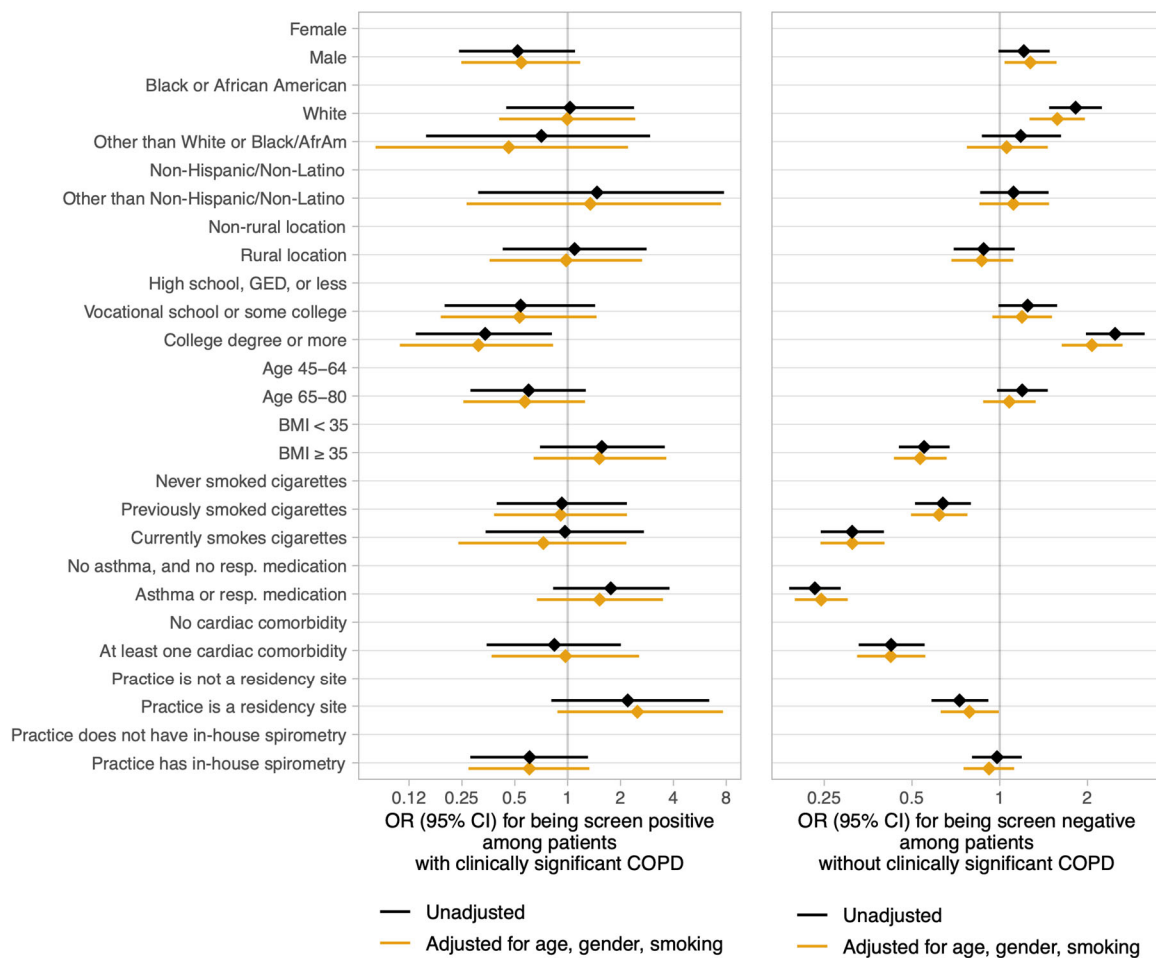

Odds ratios (ORs) were estimated and adjusted for age ( $\geq 65$  vs  $< 65$  years), gender, and smoking status (never, former, current) using logistic regression.

**eTable 1.** Characteristics of participating practices

| <b>Characteristic</b>                                                | <b>Number</b>                |
|----------------------------------------------------------------------|------------------------------|
| <b>PBRN</b>                                                          |                              |
| Mecklenburg Area Partnership for Primary Care Research - Atrium      | 20 practices / 936 patients  |
| Duke Primary Care Research Consortium                                | 26 practices / 1298 patients |
| High Plains Research Network                                         | 14 practices / 611 patients  |
| LA Net Community Health Resource Network                             | 6 practices / 281 patients   |
| Oregon Rural Practice-based Research Network                         | 11 practices / 468 patients  |
| University of Illinois Chicago PBRN                                  | 13 practices / 650 patients  |
| Circuit Clinical Integrated Research Organization                    | 10 practices / 435 patients  |
| <b>Practice location<sup>a</sup></b>                                 |                              |
| Non-rural                                                            | 82 (82.0%)                   |
| Rural                                                                | 18 (18.0%)                   |
| <b>Patients ages 45-80 seen over past 12 mo.<sup>b</sup></b>         |                              |
| Mean (SD)                                                            | 6440 (8829)                  |
| Range                                                                | 79 - 61227                   |
| <b>Practice description<sup>b</sup></b>                              |                              |
| Large health system, accountable care organization, or similar       | 35 (35.7%)                   |
| Academic medical center/health system                                | 28 (28.6%)                   |
| Federally Qualified Health Care Center                               | 18 (18.4%)                   |
| Independent practice                                                 | 10 (10.2%)                   |
| Other                                                                | 7 (7.1%)                     |
| <b>Residency program<sup>b</sup></b>                                 |                              |
| No                                                                   | 78 (79.6%)                   |
| Yes                                                                  | 20 (20.4%)                   |
| <b>Population of the community served<sup>b</sup></b>                |                              |
| < 2,000                                                              | 4 (4.1%)                     |
| 2,000 to 4,999                                                       | 5 (5.1%)                     |
| 5,000 to 19,999                                                      | 16 (16.3%)                   |
| 20,000 to 49,999                                                     | 13 (13.3%)                   |
| 50,000 to 99,999                                                     | 12 (12.2%)                   |
| 100,000 to 249,999                                                   | 5 (5.1%)                     |
| 250,000 to 499,999                                                   | 15 (15.3%)                   |
| ≥ 500,000                                                            | 28 (28.6%)                   |
| <b>Number of clinicians at site, MD/DO, primary care<sup>c</sup></b> |                              |
| Mean (SD)                                                            | 6 (7)                        |
| Range                                                                | 0 - 43                       |

| <b>Characteristic</b>                                                   | <b>Number</b> |
|-------------------------------------------------------------------------|---------------|
| <b>Number of clinicians at site, NP/PA, primary care<sup>c</sup></b>    |               |
| Mean (SD)                                                               | 2 (2)         |
| Range                                                                   | 0 - 9         |
| <b>In-house spirometry available<sup>b</sup></b>                        |               |
| No                                                                      | 40 (40.8%)    |
| Yes                                                                     | 58 (59.2%)    |
| <b>Distance to nearest pulmonary rehabilitation program<sup>b</sup></b> |               |
| Within 15 miles                                                         | 69 (70.4%)    |
| 16 to 30 miles                                                          | 11 (11.2%)    |
| 31 to 50 miles                                                          | 2 (2.0%)      |
| More than 50 miles                                                      | 5 (5.1%)      |
| Virtual program utilized                                                | 2 (2.0%)      |
| Don't know                                                              | 9 (9.2%)      |

<sup>a</sup> Human Resources & Services Administration designation based on zip code

<sup>b</sup> 2 missing values

<sup>c</sup> 4 missing values

**eTable 2.** Characteristics of excluded and included patients

| Characteristic                                             | Excluded participants<br>(n = 354) | Included participants<br>(n = 4325) | P-value |
|------------------------------------------------------------|------------------------------------|-------------------------------------|---------|
| <b>Age, years, mean (SD)</b>                               | 61.5 (9.6)                         | 61.6 (9.1)                          | 0.90    |
| <b>Gender, n (%)</b>                                       |                                    |                                     |         |
| Female                                                     | 203 (58.7%)                        | 2725 (63.0%)                        | 0.11    |
| Male                                                       | 143 (41.3%)                        | 1600 (37.0%)                        |         |
| <b>BMI ≥ 30 kg/m<sup>2</sup>, n (%)</b>                    | 169 (50.0%)                        | 2159 (49.9%)                        | 0.98    |
| <b>Ethnicity, n (%)</b>                                    |                                    |                                     |         |
| Non-Hispanic/non-Latino                                    | 274 (79.2%)                        | 3654 (84.6%)                        | 0.03    |
| Hispanic or Latino                                         | 58 (16.8%)                         | 553 (12.8%)                         |         |
| Don't know/Prefer not to answer                            | 14 (4.0%)                          | 114 (2.6%)                          |         |
| <b>Race, n (%)</b>                                         |                                    |                                     |         |
| American Indian/Alaska Native                              | 5 (1.4%)                           | 48 (1.1%)                           | <0.001  |
| Asian                                                      | 3 (0.9%)                           | 77 (1.8%)                           |         |
| Black or African American                                  | 82 (23.8%)                         | 1164 (26.9%)                        |         |
| Native Hawaiian/Other Pacific Islander                     | 1 (0.3%)                           | 8 (0.2%)                            |         |
| White                                                      | 202 (58.6%)                        | 2689 (62.2%)                        |         |
| Multiple races                                             | 13 (3.8%)                          | 49 (1.1%)                           |         |
| Don't know/Prefer not to answer                            | 39 (11.3%)                         | 287 (6.6%)                          |         |
| <b>Education, n (%)</b>                                    |                                    |                                     |         |
| Less than high school                                      | 50 (14.6%)                         | 413 (9.6%)                          | 0.03    |
| High school or GED                                         | 85 (24.9%)                         | 994 (23.0%)                         |         |
| Vocational school or some college                          | 76 (22.2%)                         | 1062 (24.6%)                        |         |
| College degree                                             | 84 (24.6%)                         | 1140 (26.4%)                        |         |
| Professional or graduate degree                            | 47 (13.7%)                         | 704 (16.3%)                         |         |
| <b>Employment, n (%)</b>                                   |                                    |                                     |         |
| Not working due to disability                              | 56 (16.3%)                         | 524 (12.1%)                         | 0.03    |
| Not working for reason other than disability               | 154 (44.8%)                        | 1858 (43.0%)                        |         |
| Working part- or full-time                                 | 134 (39.0%)                        | 1935 (44.8%)                        |         |
| <b>Health insurance, n (%)</b>                             |                                    |                                     |         |
| Private                                                    | 111 (32.1%)                        | 1564 (36.2%)                        | 0.02    |
| Public                                                     | 152 (43.9%)                        | 1587 (36.7%)                        |         |
| Both Public and Private                                    | 63 (18.2%)                         | 981 (22.7%)                         |         |
| None                                                       | 16 (4.6%)                          | 132 (3.1%)                          |         |
| Other/Don't Know                                           | 4 (1.2%)                           | 61 (1.4%)                           |         |
| <b>Asthma diagnosis and respiratory medications, n (%)</b> |                                    |                                     | 0.09    |



| Characteristic                                                                        | Excluded participants<br>(n = 354) | Included participants<br>(n = 4325) | P-value |
|---------------------------------------------------------------------------------------|------------------------------------|-------------------------------------|---------|
| No asthma history, and not using any respiratory medications                          | 283 (80.9%)                        | 3527 (81.7%)                        |         |
| No asthma history, but using at least one respiratory medication                      | 18 (5.1%)                          | 193 (4.5%)                          |         |
| Asthma history, and not using any respiratory medications                             | 27 (7.7%)                          | 215 (5.0%)                          |         |
| Asthma history, and using SABD only                                                   | 12 (3.4%)                          | 173 (4.0%)                          |         |
| Asthma history, and using daily maintenance respiratory medication                    | 10 (2.9%)                          | 210 (4.9%)                          |         |
| <b>Asthma diagnosis, n (%)</b>                                                        | 49 (14.0%)                         | 599 (13.9%)                         | 0.96    |
| <b>Cardiac comorbidity<sup>a</sup>, n (%)</b>                                         | 38 (10.8%)                         | 430 (10.0%)                         | 0.60    |
| <b>Cigarette smoking, n (%)</b>                                                       |                                    |                                     |         |
| Never                                                                                 | 187 (53.3%)                        | 2391 (55.4%)                        | 0.33    |
| Former                                                                                | 108 (30.8%)                        | 1359 (31.5%)                        |         |
| Current                                                                               | 56 (16.0%)                         | 568 (13.2%)                         |         |
| <b>Short-acting bronchodilator, n (%)</b>                                             | 34 (9.7%)                          | 493 (11.4%)                         | 0.33    |
| <b>Maintenance respiratory medication, n (%)</b>                                      |                                    |                                     |         |
| None                                                                                  | 336 (95.7%)                        | 4047 (93.6%)                        | 0.41    |
| ICS alone                                                                             | 1 (0.3%)                           | 86 (2.0%)                           |         |
| LABA or LAMA alone                                                                    | 0 (0.0%)                           | 7 (0.2%)                            |         |
| LABA and ICS                                                                          | 13 (3.7%)                          | 166 (3.8%)                          |         |
| LAMA and ICS                                                                          | 0 (0.0%)                           | 2 (0.0%)                            |         |
| LABA and LAMA                                                                         | 0 (0.0%)                           | 2 (0.0%)                            |         |
| LABA, LAMA, and ICS                                                                   | 1 (0.3%)                           | 12 (0.3%)                           |         |
| <b>COPD Assessment Test (CAT) score <math>\geq</math> 10, n (%)</b>                   | 109 (32.2%)                        | 1570 (36.3%)                        | 0.13    |
| <b>Walks slower than others or stops for breath (mMRC <math>\geq</math> 2), n (%)</b> | 47 (13.4%)                         | 651 (15.1%)                         | 0.40    |
| <b>Acute respiratory illness in past 12 months<sup>b</sup>, n (%)</b>                 | 28 (8.0%)                          | 405 (9.4%)                          | 0.39    |
| <b>CAPTURE 5-item score, mean (SD)</b>                                                | 1.7 (1.4)                          | 1.8 (1.5)                           | 0.62    |
| <b>Criteria used in determining CAPTURE screen result, n (%)</b>                      |                                    |                                     |         |
| Score 0–1                                                                             | 178 (52.4%)                        | 2200 (50.9%)                        | 0.29    |
| Score 2–4, PEFR $\geq$ threshold                                                      | 123 (36.2%)                        | 1593 (36.8%)                        |         |
| Score 2–4, PEFR < threshold                                                           | 28 (8.2%)                          | 299 (6.9%)                          |         |
| Score 5–6                                                                             | 11 (3.2%)                          | 233 (5.4%)                          |         |
| <b>PEFR (L/min), mean (SD)</b>                                                        | 376 (114)                          | 379 (114)                           | 0.62    |

<sup>a</sup> – Any of the following: angina (heart/chest pain), coronary artery disease, heart attack (MI), coronary artery bypass surgery (CABG), angioplasty/cardiac stents, congestive heart failure

<sup>b</sup> – Queried as ‘Over the last 12 months, have you had episodes of chest troubles (cough, phlegm, or shortness of breath) requiring treatment with antibiotics and/or steroids?’

**eTable 3.** Operating characteristics of the screening tool for detecting clinically significant COPD across a range of thresholds defining a positive screen

| Definition of positive screen                 | Require PEFR for scoring (%) | Screen positive (%) | Sensitivity (%) | Specificity (%) | PPV (%) | NPV (%) |
|-----------------------------------------------|------------------------------|---------------------|-----------------|-----------------|---------|---------|
| N/A (all screen negative)                     | 0.0                          | 0.0                 | 0.0             | 100.0           | -       | 97.5    |
| Score 6 with PEFR < threshold                 | 2.2                          | 0.6                 | 6.4             | 99.5            | 25.0    | 97.6    |
| Score 5–6 with PEFR < threshold               | 5.4                          | 1.5                 | 10.0            | 98.7            | 17.2    | 97.7    |
| Score 4–6 with PEFR < threshold               | 14.1                         | 3.3                 | 20.0            | 97.1            | 15.4    | 97.9    |
| Score 6, or score 3–5 with PEFR < threshold   | 24.8                         | 6.8                 | 35.5            | 93.9            | 13.2    | 98.2    |
| Score 5–6, or score 2–4 with PEFR < threshold | 43.7                         | 11.9                | 48.2            | 89.1            | 10.3    | 98.5    |
| Score 4–6, or score 1–3 with PEFR < threshold | 65.2                         | 22.1                | 67.3            | 79.1            | 7.7     | 98.9    |
| Score 3–6, or score 0–2 with PEFR < threshold | 73.1                         | 34.7                | 83.6            | 66.6            | 6.1     | 99.4    |
| Score 2–6, or score 0–1 with PEFR < threshold | 50.9                         | 54.2                | 90.9            | 46.7            | 4.3     | 99.5    |
| Score 1–6, or score 0 with PEFR < threshold   | 20.7                         | 81.1                | 99.1            | 19.4            | 3.1     | 99.9    |
| Score 0–6 (all screen positive)               | 0.0                          | 100.0               | 100.0           | 0.0             | 2.5     | -       |

**eTable 4.** Unadjusted and covariate-adjusted associations of patient and site characteristics with screening tool sensitivity and specificity for clinically significant COPD

| Variable                                              | Association with positive screening result among patients with clinically significant COPD (sensitivity) |                      | Association with negative screening result among patients without clinically significant COPD (specificity) |                      |
|-------------------------------------------------------|----------------------------------------------------------------------------------------------------------|----------------------|-------------------------------------------------------------------------------------------------------------|----------------------|
|                                                       | Unadjusted OR (95% CI)                                                                                   | Adjusted OR (95% CI) | Unadjusted OR (95% CI)                                                                                      | Adjusted OR (95% CI) |
| <b>Gender</b>                                         |                                                                                                          |                      |                                                                                                             |                      |
| Female                                                | -                                                                                                        | -                    | -                                                                                                           | -                    |
| Male                                                  | 0.52 (0.24, 1.10)                                                                                        | 0.54 (0.25, 1.18)    | 1.21 (0.99, 1.48)                                                                                           | 1.27 (1.04, 1.57)    |
| <b>Race</b>                                           |                                                                                                          |                      |                                                                                                             |                      |
| White                                                 | -                                                                                                        | -                    | -                                                                                                           | -                    |
| Black or African American                             | 0.97 (0.42, 2.24)                                                                                        | 1.01 (0.41, 2.46)    | 0.55 (0.45, 0.68)                                                                                           | 0.63 (0.51, 0.79)    |
| Other than White or Black/African American            | 0.69 (0.16, 2.62)                                                                                        | 0.46 (0.09, 2.05)    | 0.65 (0.48, 0.88)                                                                                           | 0.67 (0.50, 0.92)    |
| <b>Ethnicity</b>                                      |                                                                                                          |                      |                                                                                                             |                      |
| Non-Hispanic/non-Latino                               | -                                                                                                        | -                    | -                                                                                                           | -                    |
| Other than non-Hispanic/Non-Latino                    | 1.47 (0.31, 7.77)                                                                                        | 1.35 (0.27, 7.47)    | 1.11 (0.86, 1.47)                                                                                           | 1.11 (0.85, 1.48)    |
| <b>Practice location</b>                              |                                                                                                          |                      |                                                                                                             |                      |
| Non-rural                                             | -                                                                                                        | -                    | -                                                                                                           | -                    |
| Rural                                                 | 1.10 (0.43, 2.81)                                                                                        | 0.98 (0.36, 2.65)    | 0.88 (0.70, 1.13)                                                                                           | 0.87 (0.68, 1.11)    |
| <b>Education</b>                                      |                                                                                                          |                      |                                                                                                             |                      |
| High school, GED or less                              | -                                                                                                        | -                    | -                                                                                                           | -                    |
| Vocational school or some college                     | 0.54 (0.20, 1.43)                                                                                        | 0.53 (0.19, 1.46)    | 1.25 (0.99, 1.57)                                                                                           | 1.19 (0.94, 1.51)    |
| College degree or more                                | 0.34 (0.14, 0.81)                                                                                        | 0.31 (0.11, 0.83)    | 2.49 (1.98, 3.14)                                                                                           | 2.07 (1.63, 2.64)    |
| <b>Age</b>                                            |                                                                                                          |                      |                                                                                                             |                      |
| 45–64                                                 | -                                                                                                        | -                    | -                                                                                                           | -                    |
| 65–80                                                 | 0.60 (0.28, 1.27)                                                                                        | 0.57 (0.25, 1.26)    | 1.19 (0.98, 1.46)                                                                                           | 1.08 (0.88, 1.33)    |
| <b>BMI</b>                                            |                                                                                                          |                      |                                                                                                             |                      |
| < 35                                                  | -                                                                                                        | -                    | -                                                                                                           | -                    |
| ≥ 35                                                  | 1.56 (0.70, 3.57)                                                                                        | 1.51 (0.64, 3.65)    | 0.55 (0.45, 0.67)                                                                                           | 0.53 (0.43, 0.66)    |
| <b>Cigarette smoking</b>                              |                                                                                                          |                      |                                                                                                             |                      |
| Never                                                 | -                                                                                                        | -                    | -                                                                                                           | -                    |
| Former                                                | 0.93 (0.39, 2.17)                                                                                        | 0.91 (0.38, 2.18)    | 0.64 (0.51, 0.80)                                                                                           | 0.62 (0.50, 0.77)    |
| Current                                               | 0.96 (0.34, 2.72)                                                                                        | 0.73 (0.24, 2.16)    | 0.31 (0.24, 0.40)                                                                                           | 0.31 (0.24, 0.40)    |
| <b>Asthma and respiratory medication</b>              |                                                                                                          |                      |                                                                                                             |                      |
| No asthma history, and no respiratory medication      | -                                                                                                        | -                    | -                                                                                                           | -                    |
| Asthma history or at least one respiratory medication | 1.76 (0.83, 3.80)                                                                                        | 1.52 (0.67, 3.49)    | 0.23 (0.19, 0.28)                                                                                           | 0.24 (0.20, 0.30)    |

| Variable                                | Association with positive screening result among patients with clinically significant COPD (sensitivity) |                      | Association with negative screening result among patients without clinically significant COPD (specificity) |                      |
|-----------------------------------------|----------------------------------------------------------------------------------------------------------|----------------------|-------------------------------------------------------------------------------------------------------------|----------------------|
|                                         | Unadjusted OR (95% CI)                                                                                   | Adjusted OR (95% CI) | Unadjusted OR (95% CI)                                                                                      | Adjusted OR (95% CI) |
| <b>Cardiac comorbidity</b>              |                                                                                                          |                      |                                                                                                             |                      |
| None                                    | -                                                                                                        | -                    | -                                                                                                           | -                    |
| At least one                            | 0.84 (0.35, 2.01)                                                                                        | 0.97 (0.37, 2.55)    | 0.42 (0.33, 0.55)                                                                                           | 0.42 (0.32, 0.56)    |
| <b>Practice has a residency program</b> |                                                                                                          |                      |                                                                                                             |                      |
| No                                      | -                                                                                                        | -                    | -                                                                                                           | -                    |
| Yes                                     | 2.20 (0.81, 6.40)                                                                                        | 2.49 (0.87, 7.67)    | 0.73 (0.58, 0.91)                                                                                           | 0.79 (0.63, 0.99)    |
| <b>Practice has in-house spirometry</b> |                                                                                                          |                      |                                                                                                             |                      |
| No                                      | -                                                                                                        | -                    | -                                                                                                           | -                    |
| Yes                                     | 0.61 (0.28, 1.30)                                                                                        | 0.60 (0.27, 1.33)    | 0.98 (0.80, 1.19)                                                                                           | 0.92 (0.75, 1.12)    |

Odds ratios (ORs) were estimated and adjusted for age ( $\geq 65$  vs  $< 65$  years), gender, and smoking status (never, former, current) using logistic regression.

## eReference

1. Martinez FJ, Mannino D, Leidy NK, et al. A New Approach for Identifying Patients with Undiagnosed Chronic Obstructive Pulmonary Disease. *Am J Respir Crit Care Med*. Mar 15 2017;195(6):748-756. doi:10.1164/rccm.201603-0622OC
