# Supplementary material
Source: PubMed Central journal article supplement (PMC9929696)
Supplement: jama-e230128-s003.pdf [file jama-e230128-s003.pdf]

\*Indicates required information. Only first name, last name, and suffix will appear in PubMed.

| <b>*Group Name(s): CAPTURE Study Group</b> |                   |                              |                  |                                   |                                          |                                                         |                                                                                            |
|--------------------------------------------|-------------------|------------------------------|------------------|-----------------------------------|------------------------------------------|---------------------------------------------------------|--------------------------------------------------------------------------------------------|
| <b>*First Name and Middle Initial(s)</b>   | <b>*Last Name</b> | <b>*Suffix (eg, Jr, III)</b> | Academic Degrees | Institution                       | Location (city, state/province, country) | Role or Contribution, eg, chair, principal investigator | Group (if more than 1 Group listed in the byline) and/or Subgroup (eg, Steering Committee) |
| Emily                                      | White             |                              | MS               | SABER                             |                                          | Biostatistics                                           |                                                                                            |
| Cathy                                      | Scott             |                              | AAS              | SABER                             |                                          | Data Management                                         |                                                                                            |
| Megan                                      | Urbain            |                              | MSW              | SABER                             |                                          | Data Management                                         |                                                                                            |
| Jeffrey                                    | Holtzman          |                              | MA               | SABER                             |                                          | Software Development                                    |                                                                                            |
| Alicia                                     | Morris            |                              |                  | Weill Cornell Medicine            |                                          | Project Manager                                         |                                                                                            |
| Anna                                       | Smyth             |                              | MA               | Weill Cornell Medicine            |                                          | Financial Manager                                       |                                                                                            |
| Stefan                                     | Jhagroo           |                              |                  | Weill Cornell Medicine            |                                          | Financial Manager                                       |                                                                                            |
| Michelle                                   | LoPiccolo         |                              | MHA              | Weill Cornell Medicine            |                                          | Administrative Lead                                     |                                                                                            |
| Pete                                       | Amari             |                              |                  | COPD Foundation                   |                                          | Research Staff                                          |                                                                                            |
| Claudya                                    | Greig             |                              |                  | COPD Foundation                   |                                          | Research Staff                                          |                                                                                            |
| Brandon                                    | Holmes            |                              |                  | COPD Foundation                   |                                          | Research Staff                                          |                                                                                            |
| Elisha                                     | Malanga           |                              |                  | COPD Foundation                   |                                          | Research Staff                                          |                                                                                            |
| Sergio                                     | Martinez          |                              |                  | COPD Foundation                   |                                          | Research Staff                                          |                                                                                            |
| Gretchen                                   | McCreary          |                              |                  | COPD Foundation                   |                                          | Research Staff                                          |                                                                                            |
| Cara                                       | Pasquale          |                              |                  | COPD Foundation                   |                                          | Research Staff                                          |                                                                                            |
| Linda                                      | Walsh             |                              |                  | COPD Foundation                   |                                          | Research Staff                                          |                                                                                            |
| Ruth                                       | Tal-Singer        |                              | PhD              | COPD Foundation                   |                                          | Executive Staff                                         |                                                                                            |
| Malin                                      | Fagerås           |                              |                  | AstraZeneca                       |                                          | Industry Advisory Committee                             |                                                                                            |
| Norbert                                    | Feigler           |                              |                  | AstraZeneca                       |                                          | Industry Advisory Committee                             |                                                                                            |
| Angus                                      | Hamblin           |                              |                  | AstraZeneca                       |                                          | Industry Advisory Committee                             |                                                                                            |
| Frank                                      | Trudo             |                              |                  | AstraZeneca                       |                                          | Industry Advisory Committee                             |                                                                                            |
| Erin                                       | Tomaszewski       |                              |                  | AstraZeneca                       |                                          | Industry Advisory Committee                             |                                                                                            |
| Alberto                                    | de la Hoz         |                              |                  | Boehringer-Ingelheim              |                                          | Industry Advisory Committee                             |                                                                                            |
| Carl                                       | Abbott            |                              |                  | GlaxoSmithKline                   |                                          | Industry Advisory Committee                             |                                                                                            |
| Shahin                                     | Sanjar            |                              |                  | Sunovion                          |                                          | Industry Advisory Committee                             |                                                                                            |
| Carlos                                     | Tafur             |                              |                  | TEVA Pharmaceuticals              |                                          | Industry Advisory Committee                             |                                                                                            |
| Carole                                     | Catapano          |                              |                  | Viartis                           |                                          | Industry Advisory Committee                             |                                                                                            |
| Kim                                        | Gilchrist         |                              |                  | Viartis                           |                                          | Industry Advisory Committee                             |                                                                                            |
| Nancy                                      | Kline Leidy       |                              | PhD              | Evidera                           |                                          | Industry Advisory Committee                             |                                                                                            |
| Lindsey                                    | Amendola          |                              |                  | Circuit Clinical Research Network | New Jersey                               | Coordinator                                             |                                                                                            |
| Jose                                       | Flores            |                              |                  | Circuit Clinical Research Network | New Jersey                               | Lead Coordinator                                        |                                                                                            |
| Grace                                      | Ruh               |                              |                  | Circuit Clinical Research Network | New York                                 | Coordinator                                             |                                                                                            |
| Tammy                                      | Harvey            |                              |                  | Circuit Clinical Research Network | New York                                 | Coordinator                                             |                                                                                            |
| Ashleigh                                   | Skipper           |                              |                  | Circuit Clinical Research Network | New York                                 | Coordinator                                             |                                                                                            |
| Kate                                       | Walsh             |                              |                  | Circuit Clinical Research Network | New York                                 | Coordinator                                             |                                                                                            |
| Lauren                                     | Warsocki          |                              |                  | Circuit Clinical Research Network | New York                                 | Coordinator                                             |                                                                                            |
| Abm                                        | Shafayet          |                              |                  | Circuit Clinical Research Network | New Jersey                               | Coordinator                                             |                                                                                            |
| Cynthia                                    | Pinargotte        |                              |                  | Circuit Clinical Research Network | New Jersey                               | Coordinator                                             |                                                                                            |

\*Indicates required information. Only first name, last name, and suffix will appear in PubMed.

| *First Name and Middle Initial(s) | *Last Name       | *Suffix (eg, Jr, III) | Academic Degrees | Institution                                            | Location (city, state/province, country) | Role or Contribution, eg, chair, principal investigator | Group (if more than 1 Group listed in the byline) and/or Subgroup (eg, Steering Committee) |
|-----------------------------------|------------------|-----------------------|------------------|--------------------------------------------------------|------------------------------------------|---------------------------------------------------------|--------------------------------------------------------------------------------------------|
| Melba                             | Ventuera         |                       |                  | Circuit Clinical Research Network                      | New Jersey                               | Coordinator                                             |                                                                                            |
| Vikash                            | Mandania         |                       |                  | Circuit Clinical Research Network                      | New Jersey                               | Coordinator                                             |                                                                                            |
| Donna                             | Green            |                       |                  | Circuit Clinical Research Network                      | New Jersey                               | Coordinator                                             |                                                                                            |
| Luis                              | Paredas          |                       |                  | Circuit Clinical Research Network                      | New Jersey                               | Coordinator                                             |                                                                                            |
| Erika                             | Barba            |                       |                  | Circuit Clinical Research Network                      | New Jersey                               | Coordinator                                             |                                                                                            |
| Erica                             | Mezzasalma       |                       |                  | Circuit Clinical Research Network                      | New Jersey                               | Coordinator                                             |                                                                                            |
| Lindsey                           | Williams         |                       |                  | Circuit Clinical Research Network                      | New Jersey                               | Coordinator                                             |                                                                                            |
| Jack                              | Westfall         |                       | MD               | High Plains Research Network                           | Denver, CO                               | PI                                                      |                                                                                            |
| Jen                               | Ancona           |                       |                  | High Plains Research Network                           | Denver, CO                               | Coordinator                                             |                                                                                            |
| Lori                              | Jarell           |                       |                  | High Plains Research Network                           | Denver, CO                               | Coordinator                                             |                                                                                            |
| Megan                             | Kaiser           |                       |                  | High Plains Research Network                           | Denver, CO                               | Coordinator                                             |                                                                                            |
| Christin                          | Sutter           |                       |                  | High Plains Research Network                           | Denver, CO                               | Coordinator                                             |                                                                                            |
| Ranee                             | Chatterjee       |                       | MD               | Duke Primary Care Research Consortium                  | Durham, NC                               | Co-Investigator                                         |                                                                                            |
| Chad                              | Harrell          |                       |                  | Duke Primary Care Research Consortium                  | Durham, NC                               | Coordinator                                             |                                                                                            |
| Taylor                            | Harris           |                       |                  | Duke Primary Care Research Consortium                  | Durham, NC                               | Coordinator                                             |                                                                                            |
| Kimberly                          | Leathers         |                       |                  | Duke Primary Care Research Consortium                  | Durham, NC                               | Coordinator                                             |                                                                                            |
| Beth                              | Mancuso-Mills    |                       |                  | Duke Primary Care Research Consortium                  | Durham, NC                               | Coordinator                                             |                                                                                            |
| Morgan                            | Mangum           |                       |                  | Duke Primary Care Research Consortium                  | Durham, NC                               | Coordinator                                             |                                                                                            |
| Nikita                            | Shah             |                       |                  | Duke Primary Care Research Consortium                  | Durham, NC                               | Coordinator                                             |                                                                                            |
| Bertha                            | Leon             |                       |                  | LANet                                                  | Los Angeles, CA                          | Coordinator                                             |                                                                                            |
| Matthew                           | Leon             |                       |                  | LANet                                                  | Los Angeles, CA                          | Coordinator                                             |                                                                                            |
| Patty                             | Dionicio         |                       |                  | LANet                                                  | Los Angeles, CA                          | Coordinator                                             |                                                                                            |
| Lindsay                           | Shade            |                       |                  | Mecklenburg Area Partnership for Primary Care Research | Charlotte, NC                            | Co-Investigator                                         |                                                                                            |
| Rebecca                           | Beasley          |                       | MD               | Mecklenburg Area Partnership for Primary Care Research | Charlotte, NC                            | Co-Investigator                                         |                                                                                            |
| Andrea                            | Price            |                       |                  | Mecklenburg Area Partnership for Primary Care Research | Charlotte, NC                            | Coordinator                                             |                                                                                            |
| Cody                              | Oliver           |                       |                  | Mecklenburg Area Partnership for Primary Care Research | Charlotte, NC                            | Coordinator                                             |                                                                                            |
| Christy                           | Flynn            |                       |                  | Mecklenburg Area Partnership for Primary Care Research | Charlotte, NC                            | Coordinator                                             |                                                                                            |
| Stephen                           | Greenberg        |                       |                  | Mecklenburg Area Partnership for Primary Care Research | Charlotte, NC                            | Coordinator                                             |                                                                                            |
| Lindsay                           | Lowe             |                       |                  | Mecklenburg Area Partnership for Primary Care Research | Charlotte, NC                            | Coordinator                                             |                                                                                            |
| Laura                             | McAllister       |                       |                  | Mecklenburg Area Partnership for Primary Care Research | Charlotte, NC                            | Coordinator                                             |                                                                                            |
| Rina                              | Leonidas         |                       |                  | Mecklenburg Area Partnership for Primary Care Research | Charlotte, NC                            | Coordinator                                             |                                                                                            |
| Katherine                         | O'Hare           |                       |                  | Mecklenburg Area Partnership for Primary Care Research | Charlotte, NC                            | Coordinator                                             |                                                                                            |
| Kelsey                            | Strout           |                       |                  | Mecklenburg Area Partnership for Primary Care Research | Charlotte, NC                            | Coordinator                                             |                                                                                            |
| Jeremy                            | Thomas           |                       |                  | Mecklenburg Area Partnership for Primary Care Research | Charlotte, NC                            | Coordinator                                             |                                                                                            |
| Lyle J.                           | Fagnan           |                       | MD               | Oregon Rural Practice-Based Research Network           | Portland, OR                             | PI                                                      |                                                                                            |
| Xaviera                           | Martinez-Armenta |                       |                  | Oregon Rural Practice-Based Research Network           | Portland, OR                             | Coordinator                                             |                                                                                            |
| Lindsay                           | Shankle          |                       |                  | Oregon Rural Practice-Based Research Network           | Portland, OR                             | Coordinator                                             |                                                                                            |
| Martha                            | Snow             |                       |                  | Oregon Rural Practice-Based Research Network           | Portland, OR                             | Coordinator                                             |                                                                                            |
| Valeria                           | Vazquez-Trejo    |                       |                  | Oregon Rural Practice-Based Research Network           | Portland, OR                             | Coordinator                                             |                                                                                            |
| Lisa                              | Tannikula        |                       |                  | Oregon Rural Practice-Based Research Network           | Portland, OR                             | Coordinator                                             |                                                                                            |

## Supplemental Online Content: Nonauthor Collaborators

\*Indicates required information. Only first name, last name, and suffix will appear in PubMed.

| *First Name and Middle Initial(s) | *Last Name | *Suffix (eg, Jr, III) | Academic Degrees | Institution                                            | Location (city, state/province, country) | Role or Contribution, eg, chair, principal investigator | Group (if more than 1 Group listed in the byline) and/or Subgroup (eg, Steering Committee) |
|-----------------------------------|------------|-----------------------|------------------|--------------------------------------------------------|------------------------------------------|---------------------------------------------------------|--------------------------------------------------------------------------------------------|
| Ariel                             | Leifer     |                       | MD               | University of Illinois at Chicago Primary Care Network | Chicago, IL                              | Co-Investigator                                         |                                                                                            |
| Jonathan                          | Radosta    |                       | MD               | University of Illinois at Chicago Primary Care Network | Chicago, IL                              | Co-Investigator                                         |                                                                                            |
| Kyungran                          | Shim       |                       | MD               | University of Illinois at Chicago Primary Care Network | Chicago, IL                              | Co-Investigator                                         |                                                                                            |
| Christina                         | Wells      |                       | MD               | University of Illinois at Chicago Primary Care Network | Chicago, IL                              | Co-Investigator                                         |                                                                                            |
| Diane                             | Garcia     |                       |                  | University of Illinois at Chicago Primary Care Network | Chicago, IL                              | Coordinator                                             |                                                                                            |
| Samantha                          | Madrid     |                       |                  | University of Illinois at Chicago Primary Care Network | Chicago, IL                              | Coordinator                                             |                                                                                            |
| Esther                            | Pacheco    |                       |                  | University of Illinois at Chicago Primary Care Network | Chicago, IL                              | Coordinator                                             |                                                                                            |
| Leonard                           | Romo       |                       |                  | University of Illinois at Chicago Primary Care Network | Chicago, IL                              | Coordinator                                             |                                                                                            |
| Sara                              | Ross       |                       |                  | University of Illinois at Chicago Primary Care Network | Chicago, IL                              | Coordinator                                             |                                                                                            |
| Evelyn                            | Velazquez  |                       |                  | University of Illinois at Chicago Primary Care Network | Chicago, IL                              | Coordinator                                             |                                                                                            |
| Natasha                           | Brown      |                       |                  | University of Illinois at Chicago Primary Care Network | Chicago, IL                              | Coordinator                                             |                                                                                            |
| Gordon                            | Bernard    |                       | MD               | Vanderbilt University                                  | Nashville, TN                            | DSMB Member                                             |                                                                                            |
| Deborah                           | Barnbaum   |                       | MD               | Kent State University                                  | Kent, OH                                 | DSMB Member                                             |                                                                                            |
| Joao                              | de Andrade |                       | MD               | Vanderbilt University                                  | Nashville, TN                            | DSMB Member                                             |                                                                                            |
| Daren                             | Knoel      |                       | PhD              | University of Nebraska                                 | Lincoln, NE                              | DSMB Member                                             |                                                                                            |
| Peter                             | Lindenauer |                       | MD, MSC, FACP    | Baystate Medical Center                                | Springfield, MA                          | DSMB Member                                             |                                                                                            |
| Andre                             | Rogatko    |                       | PhD              | Independent Research                                   |                                          | DSMB Member                                             |                                                                                            |
| Marinella                         | Temprosa   |                       | PhD              | George Washington University                           | Washington, DC                           | DSMB Member                                             |                                                                                            |
