# Supplementary material
Source: PubMed Central journal article supplement (PMC9929696)
Supplement: jama-e230128-s004.pdf [file jama-e230128-s004.pdf]

## Data Sharing Statement

Martinez. Discriminative Accuracy of the CAPTURE Tool for Identifying Chronic Obstructive Pulmonary Disease in US Primary Care Settings. *JAMA*. Published February 14, 2023.  
doi:10.1001/jama.2023.0128

### Data

**Data available:** Yes

**Data types:** Deidentified participant data

**How to access data:** The data will be available when the rest of the secondary and ad hoc results have been published.

**When available:** beginning date: 05-01-2024

### Supporting Documents

**Document types:** Other (please specify)

**Additional Information:** The data statistical/analytic code and informed consent form and other relevant data will be available once the study is completed. The study is estimated to be completed 5/1/23, with data available 1 year after.

**How to access documents:** This is not yet available.

**When available:** beginning date: 05-01-2024

### Additional Information

**Who can access the data:** Anyone requesting the data per NHLBI policies

**Types of analyses:** For work that meets NHLBI policies

**Mechanisms of data availability:** Without investigator support necessary but investigator support encouraged to maximize scientific input and facilitate analyses
